# Supplementary material for: Immune Protection against Lethal Fungal-Bacterial Intra-Abdominal Infections
Source: PubMed Central journal article supplement (PMC5770546; doi:10.1128/mbio.01472-17), 2018-01-16

**Fig S1A**

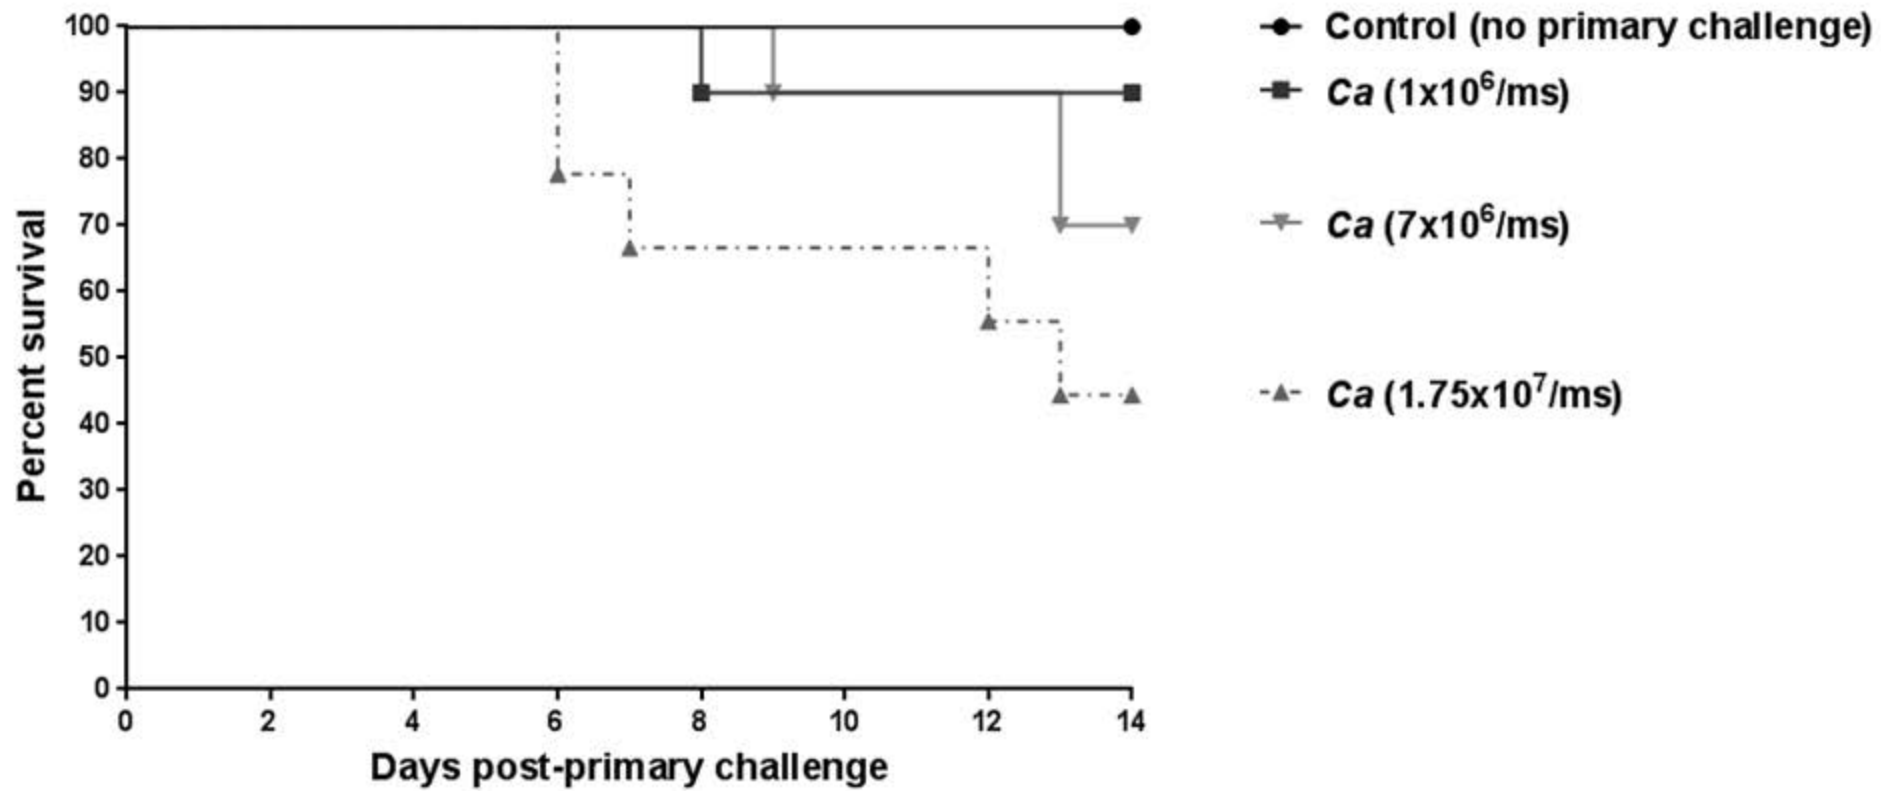

**Fig S1B**

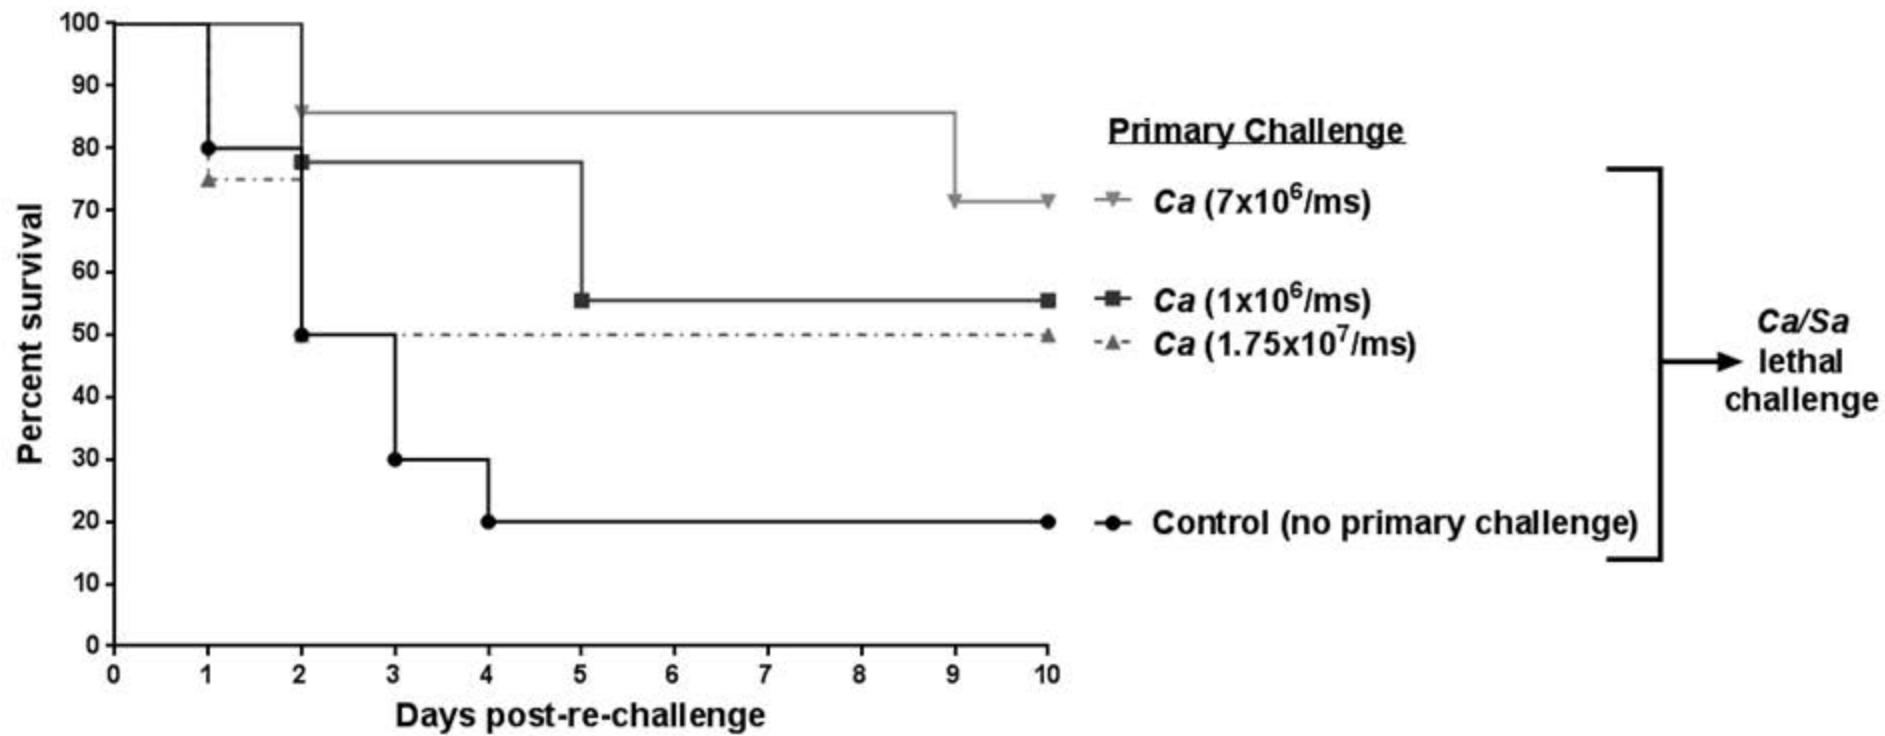

Supplement: mbo001183667sf1.pdf [file mbo001183667sf1.pdf]
