# Supplementary material for: Immune Protection against Lethal Fungal-Bacterial Intra-Abdominal Infections
Source: PubMed Central journal article supplement (PMC5770546; doi:10.1128/mbio.01472-17), 2018-01-16

**Fig S2A**

**Control**

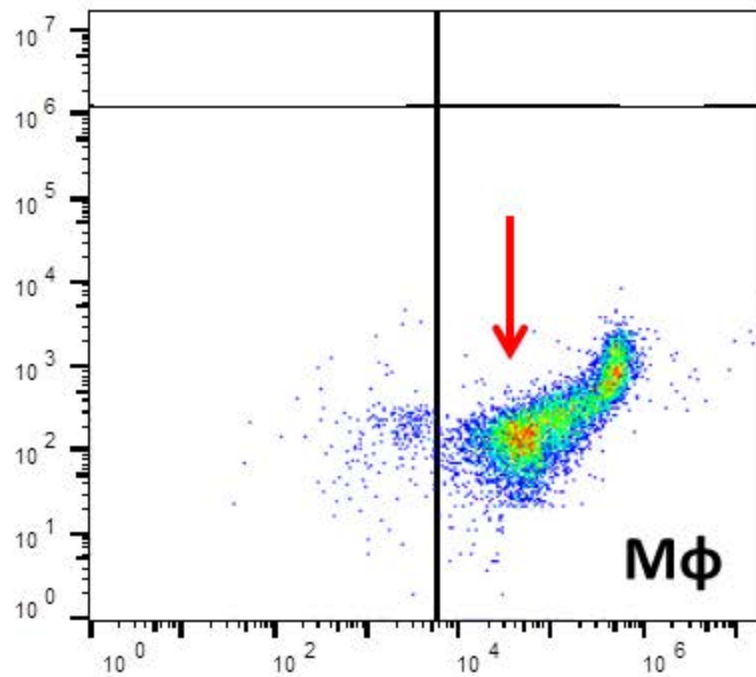

**Cl<sub>2</sub> MDP-Liposome  
(Mφ-depleted)**

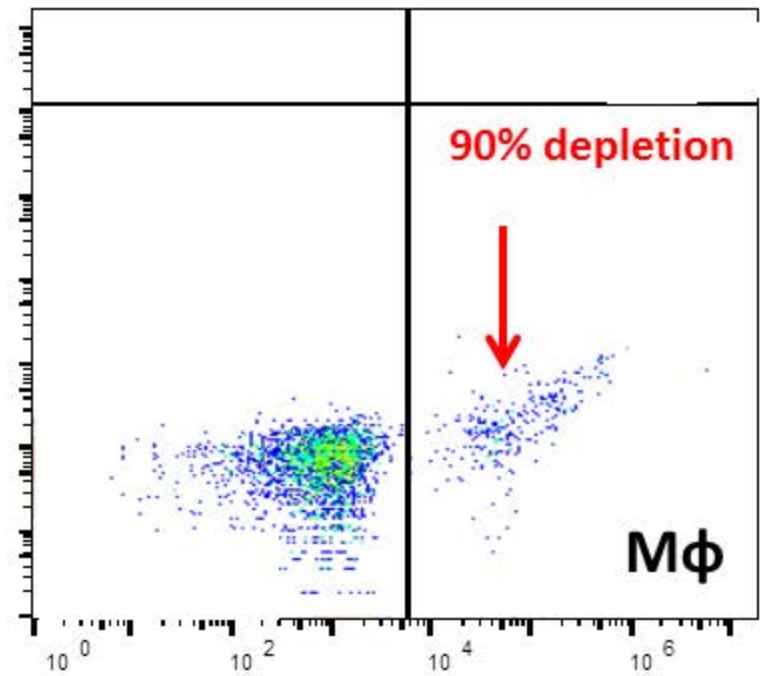

**Fig S2B**

**Isotype Control**

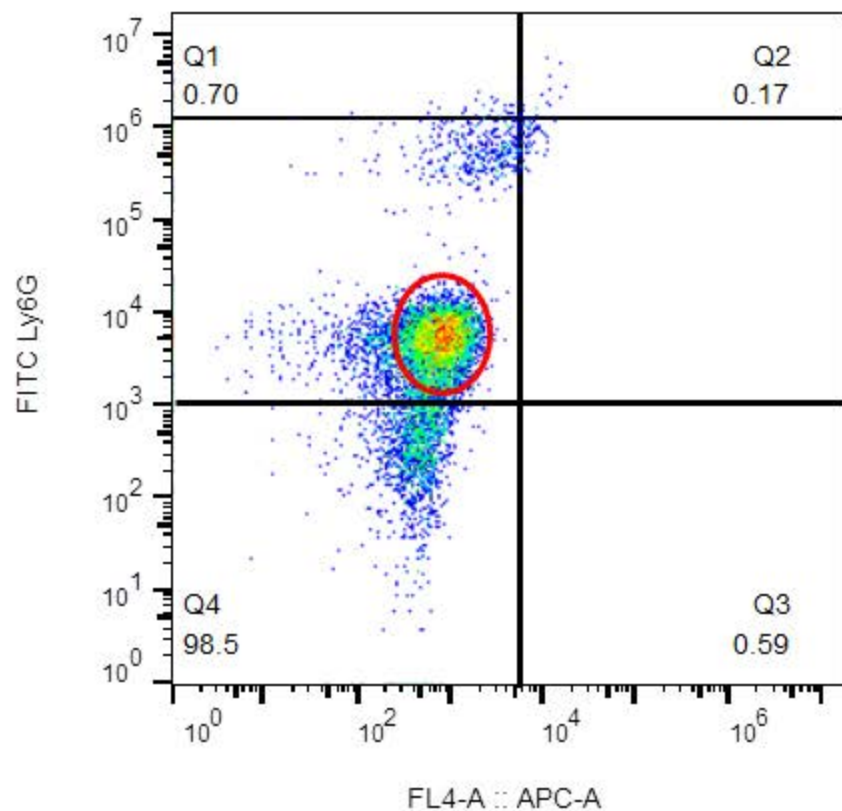

**Anti-Gr-1 antibody  
(PMNL-depleted)**

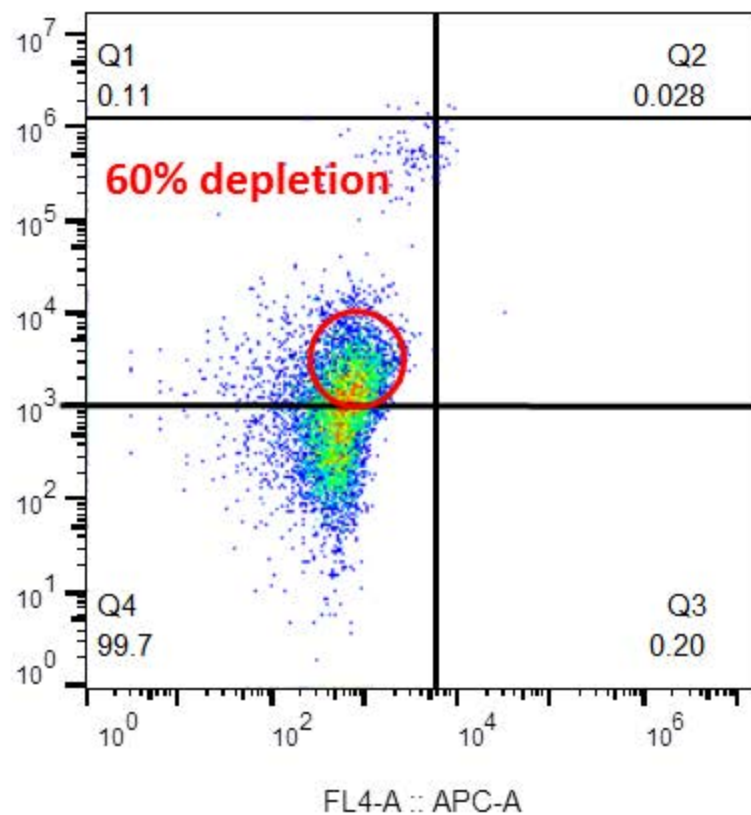

Supplement: mbo001183667sf2.pdf [file mbo001183667sf2.pdf]
